# Supplementary material for: Phytoestrogen genistein inhibits EGFR/PI3K/NF-kB activation and induces apoptosis in human endometrial hyperplasial cells
Source: Royal Society of Chemistry journal article supplement (doi:10.1039/c5ra06167a), 2015-01-01
Supplement: c5ra06167a1.pdf [file c5ra06167a1.pdf]

## Supplementary Information

**Supplementary Table 1:**

Nucleotide sequence of primers used for real time –PCR.

| S.No. | Genes            | Primer sequence                                                               |
|-------|------------------|-------------------------------------------------------------------------------|
| 1.    | ER $\alpha$      | Forward 5'-CCACCAACCAGTGCACCATT-3'<br>Reverse 5'-GGTCTTTTCGTATCCCACCTTT-3'    |
| 2.    | PR               | Forward 5'-GATTCAGAAGCCAGCCAG-3'<br>Reverse 5'-TGCCTCTCGCCCTAGTTGAT-3'        |
| 3.    | PCNA             | Forward 5'-TGGAGAACTTGGAAATGGAAA-3'<br>Reverse 5'-GAACTGGTTCATTCATCTCTATGG-3' |
| 4.    | Bax              | Forward 5'-CAGTTGAAGTTGCCGTCAGA-3'<br>Reverse 5'-AACATGGAGCTGCAGAGGAT-3'      |
| 5.    | BCL-2            | Forward 5'-ACAGTTCCACAAAGGCATCC-3'<br>Reverse 5'-ATGTGTGTGGAGAGCGTCAA-3'      |
| 6.    | $\beta$ -catenin | Forward 5'- CCAATATCAAGTCCAAGATC-3'<br>Reverse 5'- AGCTGACCAGCTCTCTCTTC-3'    |
| 7.    | Caspases-3       | Forward 5'-TGTGAGGCGGTTGTAGAAGA-3'<br>Reverse 5'-GGGCTCGCTAACTCCTCAC-3'       |
| 8.    | GAPDH            | Forward 5'- AGCCACATCGCTCAGACAC-3'<br>Reverse 5'- AATACGACCAAATCCGTTGACT-3'   |

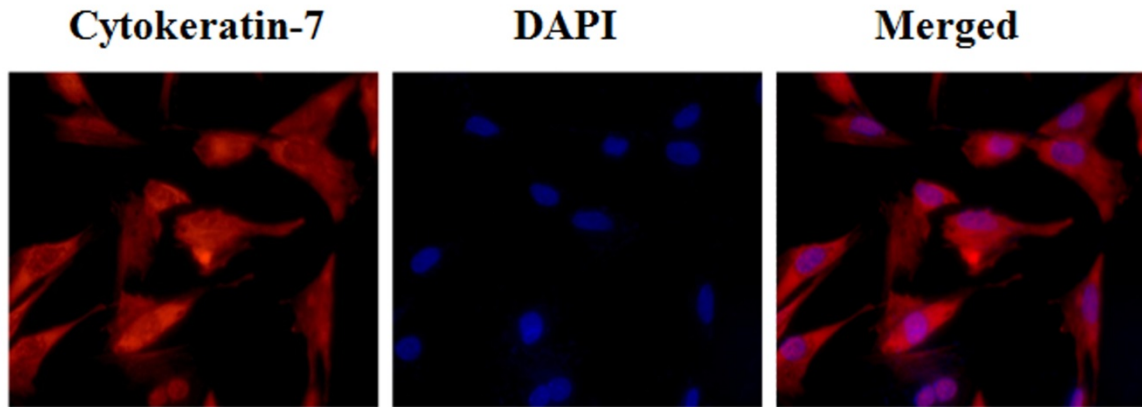

**Supplementary Fig. 1:** The human endometrial hyperplasia cells were characterized by the expression of cytokeratin-7, an epithelial marker, by immunofluorescence. Primary human endometrial hyperplasia cells were fixed, permeabilized, incubated with cytokeratin-7 antibody for overnight, and incubated with FITC-conjugated anti-mouse antibody for 1 h. The preparations were washed and counterstained with DAPI and cell images were captured using a Nikon fluorescence microscope at 40X.

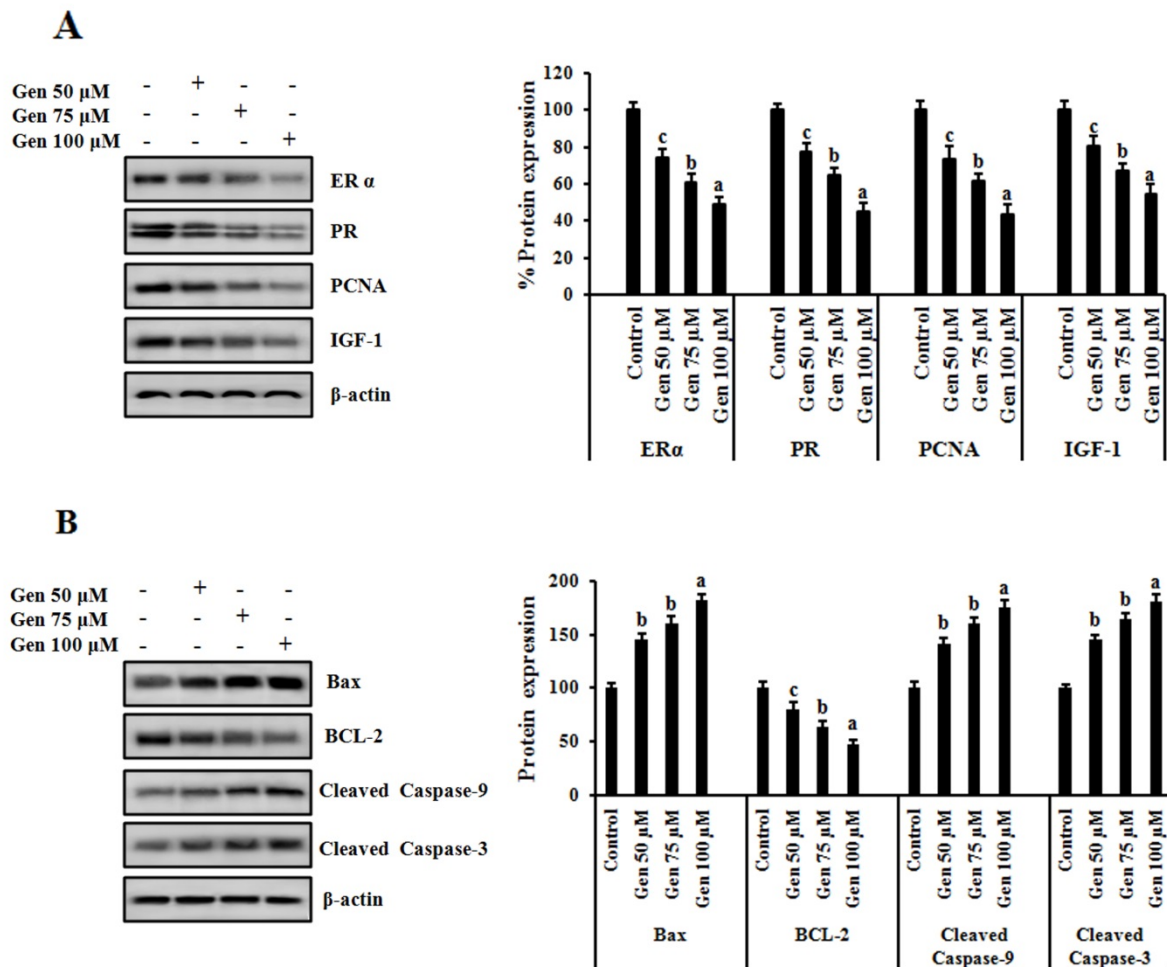

**Supplementary Fig. 2:** Effect of genistein on expression of (A) proliferation markers and (B) apoptotic marker in human primary endometrial hyperplasia cells by western blotting. Cells were treated in dose dependent manner with vehicle, 50, 75 and 100  $\mu$ M of genistein for 48 h.  $\beta$ -actin was used as internal control to correct loading error. Densitometric quantitation of protein expression levels is shown as % changes.  $\pm$ S.E.M. p values are a-  $p < 0.001$ , b-  $p < 0.01$ , c-  $p < 0.05$  and d-  $p > 0.05$  versus control.

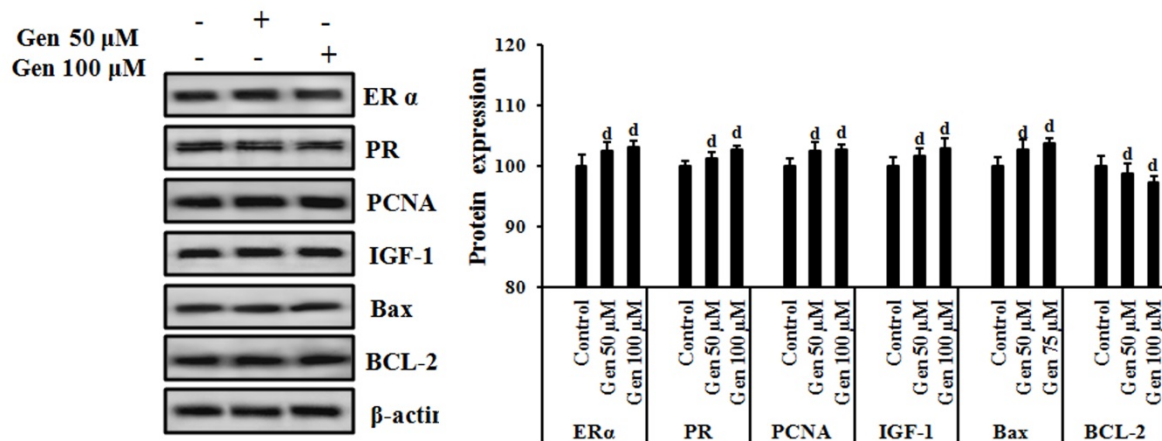

**Supplementary Fig. 3:** Effect of genistein on expression of proliferation markers and apoptotic marker in human primary normal endometrial cells by western blotting. Cells were treated with vehicle, 50, and 100 μM of genistein for 48 h. β-Actin was used as internal control to correct loading error. Densitometric quantitation of protein expression levels is shown as % changes. Data are expressed as mean of three different experiments on normal samples; ±S.E.M. p values are a- p<0.001, b-p<0.01, c-p<0.05 and d-p>0.05 versus control
